# Supplementary material
Source: PubMed Central journal article supplement (PMC8765759)
Supplement: mmc1.pdf [file mmc1.pdf]

# THE LANCET

## Supplementary appendix

This appendix formed part of the original submission. We post it as supplied by the authors.

Supplement to: Kuhlmann C, Konstanze Mayer C, Claassen M et al. Breakthrough infections with SARS-CoV-2 omicron despite mRNA vaccine booster dose. *Lancet* 2022; published online Jan 18. [https://doi.org/10.1016/S0140-6736\(22\)00090-3](https://doi.org/10.1016/S0140-6736(22)00090-3).

## Appendix

### Title:

Breakthrough infections with SARS-CoV-2 omicron despite mRNA vaccine booster dose

### Authors:

Constanze Kuhlmann, Carla Konstanze Mayer, Mathilda Claassen, Tongai Maponga, Wendy A. Burgers, Roanne Keeton, Catherine Riou, Andrew D. Sutherland, Tasnim Suliman, Megan L. Shaw, Wolfgang Preiser

Corresponding author

Wolfgang Preiser  
Division of Medical Virology  
Faculty of Medicine and Health Sciences  
University of Stellenbosch  
National Health Laboratory Service (NHLS) Tygerberg  
Tygerberg Campus, Cape Town, South Africa  
+27 21 938 9353  
[preiser@sun.ac.za](mailto:preiser@sun.ac.za)

### Author statements:

The bodies who contributed funding for this study, namely the South African Medical Research Council, Poliomyelitis Research Foundation and National Health Laboratory Service Research Trust, had no role in its conception, conduct or the writing of the Correspondence.

### Contributions:

Constanze Kuhlmann (CK) and Carla Konstanze Mayer (CM) (joint 1<sup>st</sup> authors) and Wolfgang Preiser (WP) (senior author) conceptualised and designed the study, obtained ethics approval and informed consent from the participants and organised logistics. CK and CM acquired clinical data and samples and analysed clinical data. WP, Megan Shaw (MS), Wendy Burgers (WB) and Catherine Riou (CR) oversaw and obtained funding for the laboratory investigations which were conducted by Tongai Maponga (TM), Mathilda Claassen (MC), Andrew Sutherland (AS), Tasnim Suliman (TS) and Roanne Keeton (RK). All authors verified data and analysed results. CK, CM and WP drafted and wrote the manuscript which was reviewed by all authors. All authors had full access to the data and approved submission of this Article. WP, CK and CM had the final responsibility to submit for publication.

### Declaration of interests:

We declare no competing interests.

## Additional information on sample handling (with references)

Nasopharyngeal swab samples, obtained as dry swabs and stored at +4°C, were eluted in 1.5 millilitre (mL) of phosphate-buffered saline and RNA extracted using the NucliSens easyMAG system (bioMérieux SA, Marcy l'Etoile, France). Viral genome sequences were determined by Oxford Nanopore Technologies (Oxford, UK) sequencing on the GridION using the ARTIC V3 primers set (Engelbrecht et al., 2021) and SARS-CoV-2 RNA loads by quantitative real-time PCR using the E-gene target only (Corman et al., 2020). The *in vitro* transcribed RNA generated with the TranscriptAid T7 High Yield Transcription kit (Thermo Scientific, MA, USA) of a cloned E-gene (courtesy of J. Bhiman, NICD) was used as quantification standard. Serum samples were tested by the Quant II IgG anti-Spike 2-CoV-SARS (Abbott, Illinois, USA) to determine SARS-CoV-2 anti-spike IgG levels (Grupel et al., 2021). To assess T-cell responses, peripheral blood mononuclear cells were isolated from blood samples taken 15-17 days after symptom onset from six of the individuals. After stimulation with SARS-CoV-2 peptide pools (1 µg/mL PepTivator Spike, Nucleocapsid and Membrane, Miltenyi Biotec, Auburn, CA, USA), intracellular cytokine staining and flow cytometry were performed as described (Keeton et al., 2021).

Engelbrecht S, Delaney K, Kleinhans B, Wilkinson E, Tegally H, Stander T, et al. Multiple Early Introductions of SARS-CoV-2 to Cape Town, South Africa. *Viruses*. 2021 Mar 22;13(3):526.

Corman VM, Landt O, Kaiser M, Molenkamp R, Meijer A, Chu DK, et al. Detection of 2019 novel coronavirus (2019-nCoV) by real-time RT-PCR. *Euro Surveill*. 2020 Jan;25(3):2000045.

Grupel D, Gazit S, Schreiber L, Nadler V, Wolf T, Lazar R, et al. Kinetics of SARS-CoV-2 anti-S IgG after BNT162b2 vaccination. *Vaccine*. 2021 Sep 7;39(38):5337-5340.

Keeton R, Richardson SI, Moyo-Gwete T, Hermanus T, Tincho MB, Benede N, et al. Prior infection with SARS-CoV-2 boosts and broadens Ad26.COVS immunogenicity in a variant-dependent manner. *Cell Host Microbe [Internet]*. 2021;29(11):1611-1619.e5.

| Participant |     | Vaccination history  |           |                      |          |                      |                    | Illness and laboratory findings |            |                                    |                                  |  |
|-------------|-----|----------------------|-----------|----------------------|----------|----------------------|--------------------|---------------------------------|------------|------------------------------------|----------------------------------|--|
|             |     | 1 <sup>st</sup> dose |           | 2 <sup>nd</sup> dose |          | 3 <sup>rd</sup> dose |                    | Date of                         |            | SARS-CoV-2 viral load              | Anti-SARS-CoV-2 spike antibodies |  |
| Age         | Sex | Date                 | Vaccine   | Date                 | Vaccine  | Date                 | Vaccine            | onset of symptoms               | sample     | PANGO lineage, GISAID accession ID |                                  |  |
| 26          | f   | 7 Feb 2021           | BNT162b2  | 28 Feb 2021          | BNT162b2 | 10 Nov 2021          | BNT162b2           | 2 Dec 2021                      | 4 Dec 2021 | 4.57 log <sub>10</sub> copies / mL | 15011 AU / mL                    |  |
|             |     |                      |           |                      |          |                      |                    |                                 |            | B.1.1.529, EPI_ISL_8152813         |                                  |  |
| 27          | f   | 30 Dec 2020          | BNT162b2  | 19 Jan 2021          | BNT162b2 | 3 Oct 2021           | CX-024414 (100 µg) | 1 Dec 2021                      | 4 Dec 2021 | 8.22 log <sub>10</sub> copies / mL | > 40000 AU / mL                  |  |
|             |     |                      |           |                      |          |                      |                    |                                 |            | B.1.1.529, EPI_ISL_7452792         |                                  |  |
| 39          | m   | 28 Apr 2021          | BNT162b2  | 13 May 2021          | BNT162b2 | 8 Nov 2021           | BNT162b2           | 2 Dec 2021                      | 5 Dec 2021 | 4.07 log <sub>10</sub> copies / mL | 23026 AU / mL                    |  |
|             |     |                      |           |                      |          |                      |                    |                                 |            | B.1.1.529, EPI_ISL_7452799         |                                  |  |
| 25          | f   | 21 Jan 2021          | BNT162b2  | 11 Feb 2021          | BNT162b2 | 26 Oct 2021          | BNT162b2           | 30 Nov 2021                     | 4 Dec 2021 | 5.67 log <sub>10</sub> copies / mL | 19123 AU / mL                    |  |
|             |     |                      |           |                      |          |                      |                    |                                 |            | B.1.1.529, EPI_ISL_7452795         |                                  |  |
| 25          | f   | 26 Mar 2021          | BNT162b2  | 7 May 2021           | BNT162b2 | 3 Nov 2021           | BNT162b2           | 1 Dec 2021                      | 4 Dec 2021 | 7.98 log <sub>10</sub> copies / mL | 18507 AU / mL                    |  |
|             |     |                      |           |                      |          |                      |                    |                                 |            | B.1.1.529, EPI_ISL_7452796         |                                  |  |
| 25          | m   | 30 Apr 2021          | BNT162b2  | 11 Jun 2021          | BNT162b2 | 3 Nov 2021           | BNT162b2           | 2 Dec 2021                      | 4 Dec 2021 | 7.37 log <sub>10</sub> copies / mL | 16752 AU / mL                    |  |
|             |     |                      |           |                      |          |                      |                    |                                 |            | B.1.1.529, EPI_ISL_7452797         |                                  |  |
| 27          | f   | 28 Feb 2021          | ChAdOx1-S | 3 May 2021           | BNT162b2 | 26 Oct 2021          | BNT162b2           | 30 Nov 2021                     | 5 Dec 2021 | 6.77 log <sub>10</sub> copies / mL | n.d. (no sample available)       |  |
|             |     |                      |           |                      |          |                      |                    |                                 |            | B.1.1.529, EPI_ISL_8152814         |                                  |  |

**Table 1. Basic demographic data, vaccination history and laboratory findings.** Legend: age: in years; sex: f = female, m = male; vaccine: BNT162b2 (Comirnaty; BioNTech, Mainz, Germany); CX-024414 (Spikevax; Moderna, Cambridge, MA, USA); ChAdOx1-S (Vaxzevria; AstraZeneca, Oxford, UK); AU = arbitrary unit; copies / mL = viral RNA copies / mL sample.

| Clinical symptoms   | Number of cases (n) |       |       |       |        |        |        |
|---------------------|---------------------|-------|-------|-------|--------|--------|--------|
|                     | Day 1               | Day 3 | Day 5 | Day 7 | Day 10 | Day 14 | Day 21 |
| Anosmia             | 0                   | 1     | 0     | 0     | 0      | 0      | 0      |
| Backpain            | 0                   | 1     | 1     | 0     | 0      | 0      | 0      |
| Chest pain          | 0                   | 1     | 1     | 1     | 1      | 0      | 0      |
| Chest pressure      | 2                   | 1     | 1     | 1     | 1      | 1      | 1      |
| Conjunctivitis      | 0                   | 0     | 0     | 0     | 0      | 0      | 0      |
| Diarrhoea           | 0                   | 0     | 0     | 0     | 0      | 0      | 0      |
| Dry cough           | 3                   | 6     | 7     | 7     | 4      | 4      | 3      |
| Dysgeusia           | 0                   | 1     | 0     | 0     | 0      | 0      | 0      |
| Fatigue             | 5                   | 4     | 4     | 4     | 4      | 5      | 5      |
| Fever               | 1                   | 1     | 1     | 1     | 0      | 0      | 0      |
| Headache            | 4                   | 4     | 2     | 3     | 2      | 0      | 0      |
| Myalgia             | 0                   | 2     | 1     | 2     | 1      | 0      | 0      |
| Nausea              | 2                   | 0     | 0     | 0     | 0      | 0      | 0      |
| Night sweat         | 1                   | 1     | 0     | 0     | 0      | 0      | 0      |
| Rhinitis            | 2                   | 4     | 4     | 5     | 3      | 2      | 2      |
| Shortness of breath | 0                   | 2     | 3     | 3     | 0      | 0      | 0      |
| Sinus pressure      | 2                   | 6     | 5     | 4     | 2      | 0      | 0      |
| Skin rash           | 0                   | 0     | 1     | 1     | 1      | 0      | 0      |
| Sore throat         | 6                   | 6     | 6     | 4     | 2      | 1      | 1      |

**Table 2. Clinical symptoms during the observation period.** Day 1 = day of onset of symptoms, day 10 = end of isolation period, Day 21 = end of observation period.

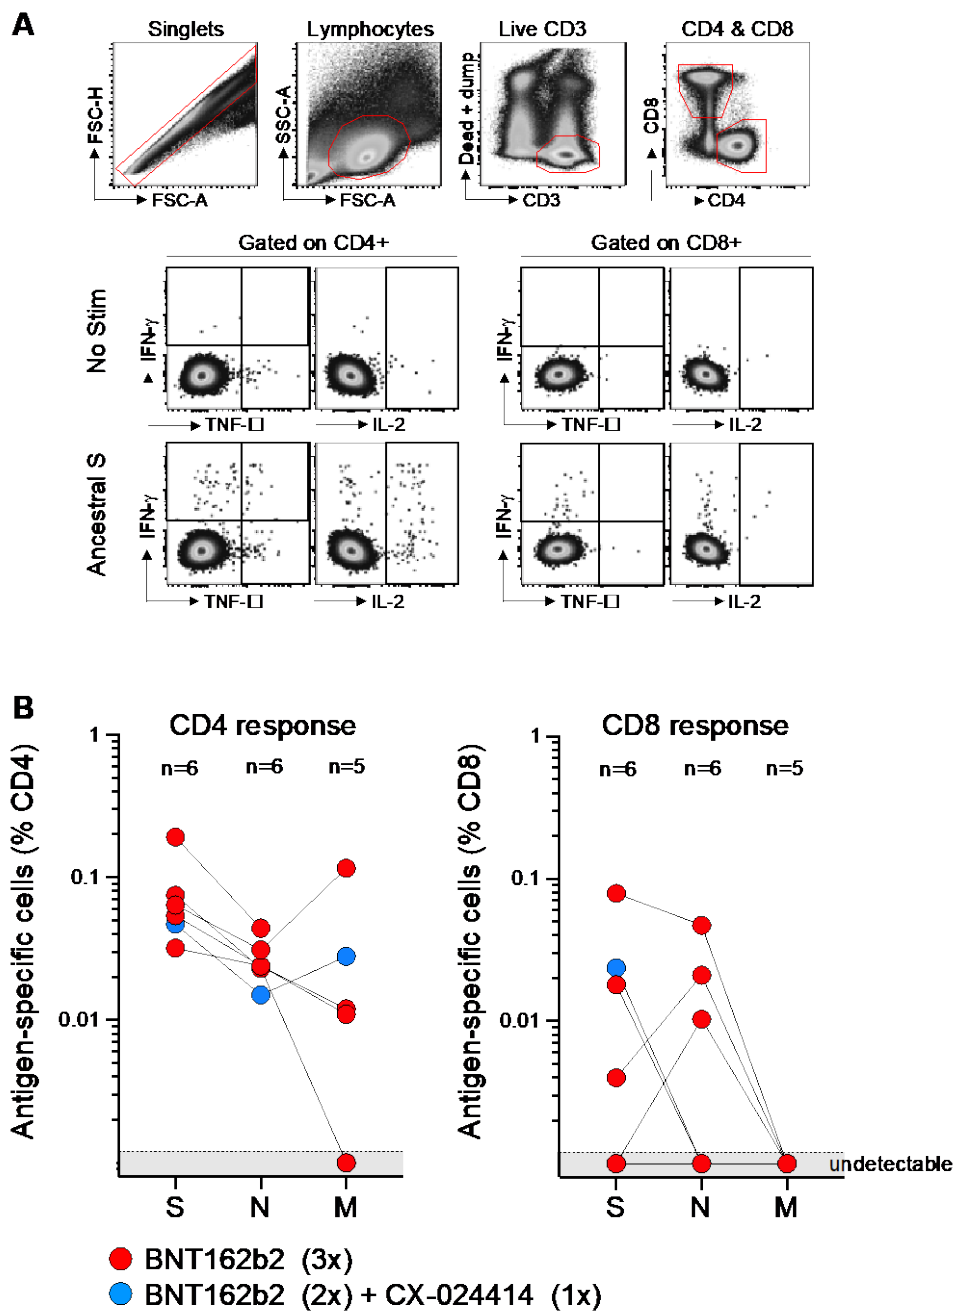

**Figure 1. Specific T-cell responses >2 weeks after Omicron breakthrough infection. A.** Gating strategy and representative example of intracellular staining showing the production of IFN-g, TNF-a and IL-2 cytokines in response to ancestral SARS-CoV-2 Spike peptide pool. **B.** Frequencies of CD4+ T cells (left panel) and CD8+ T cell (right panel) producing any of the measured cytokines (IFN-g, TNF-a or IL-2) in response to ancestral Spike (S), Nucleocapsid (N) and Membrane (M) peptide pools.

Legend: BNT162b2 (Comirnaty, BioNTech, Mainz, Germany); CX-024414 (Moderna, Cambridge, MA, USA).
